# Supplementary material
Source: PubMed Central journal article supplement (PMC7385683)

## Supplementary Online Content

Swayambunathan J, Dasgupta A, Rosenberg PS, Hannan MT, Kiel DP, Bhattacharyya T. Incidence of hip fracture over 4 decades in the Framingham Heart Study. *JAMA Intern Med*. Published online July 27, 2020. doi:10.1001/jamainternmed.2020.2975

**eFigure.** Prevalence of Early Menopause and Estrogen Replacement Therapy Among Females 1971-2010

This supplementary material has been provided by the authors to give readers additional information about their work.

eFigure.

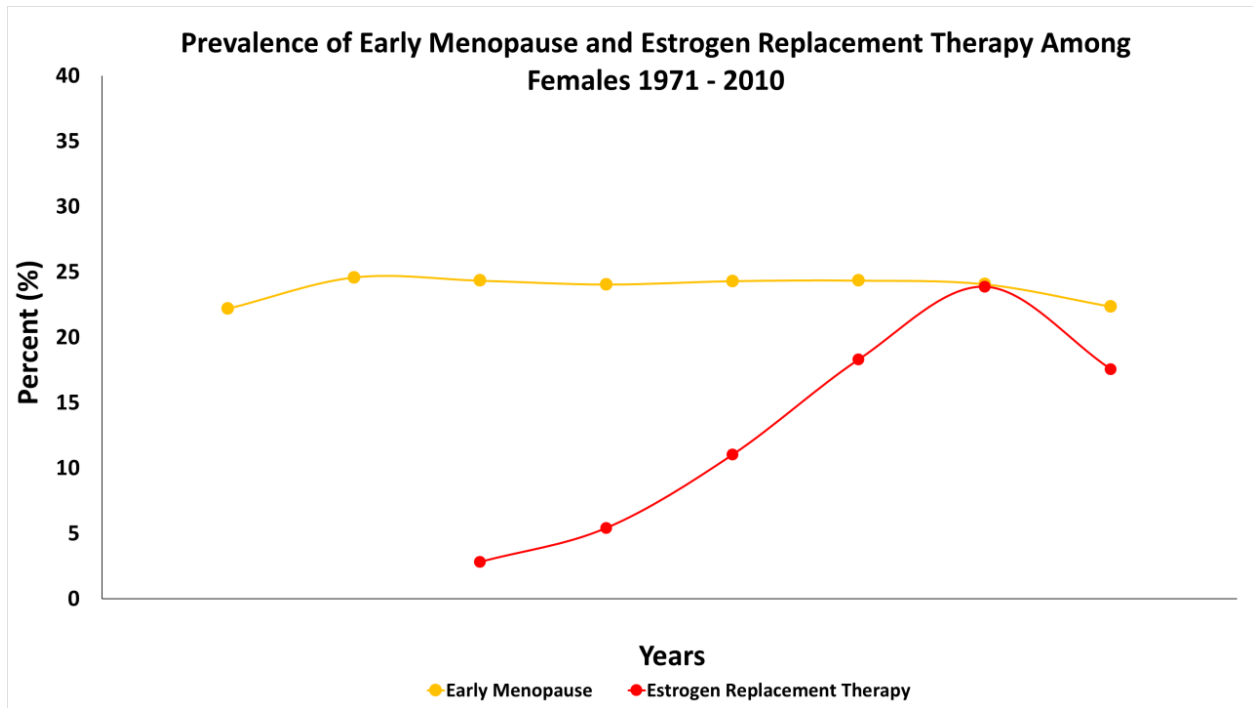

Supplement: jamainternmed-e202975-s001.pdf [file jamainternmed-e202975-s001.pdf]
